# Supplementary material
Source: PubMed Central journal article supplement (PMC11298758)
Supplement: NIHMS2003099-supplement-source_data.pdf [file NIHMS2003099-supplement-source_data.pdf]

---

**Supplementary information**

---

**7-Dehydrocholesterol dictates ferroptosis sensitivity**

---

In the format provided by the authors and unedited

# Supplementary Figure

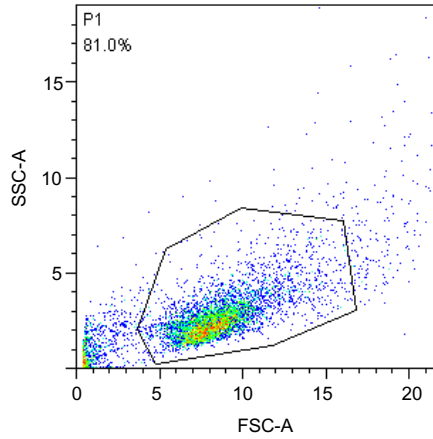

**Supplementary Fig.1** An example of the gating strategy for lipid peroxidation and mitochondrial lipid peroxidation assay.

P1 area was considered as viable cells and analyzed.

ED.Fig. 2b

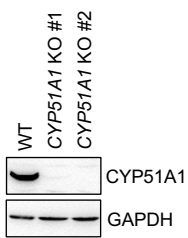

Raw data

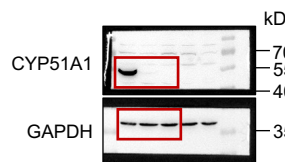

ED.Fig. 2f

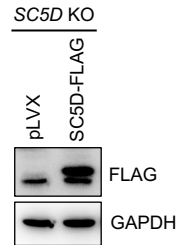

Raw data

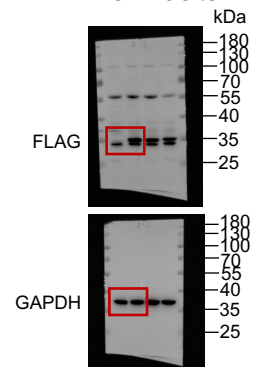

ED.Fig. 2g

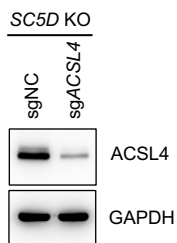

Raw data

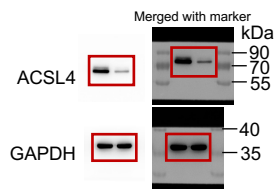

ED.Fig. 2j

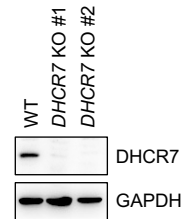

Raw data

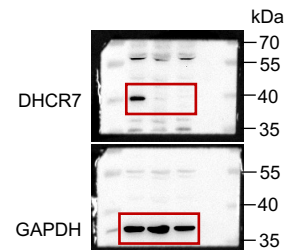

**Supplementary Fig.2** Raw images of immunoblotting.

Raw images of immunoblotting with a molecular marker were shown. Red areas were cropped for visualization.

ED.Fig. 2l

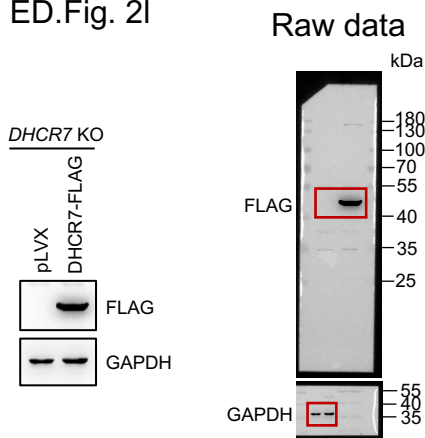

ED.Fig. 3f

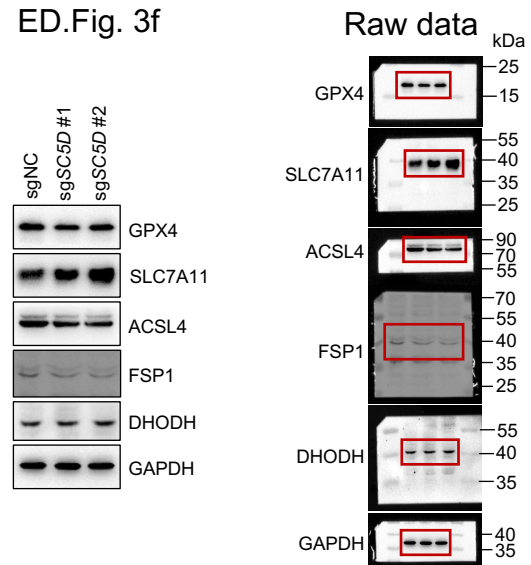

ED.Fig. 3g

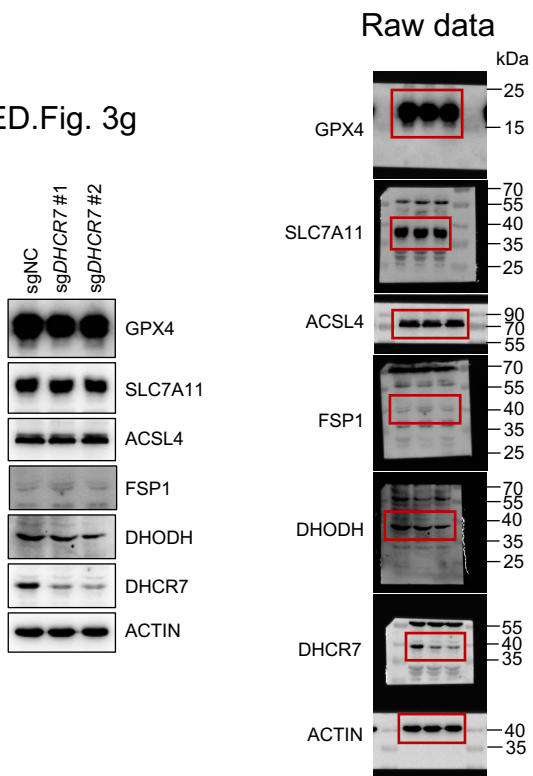

ED.Fig. 4a

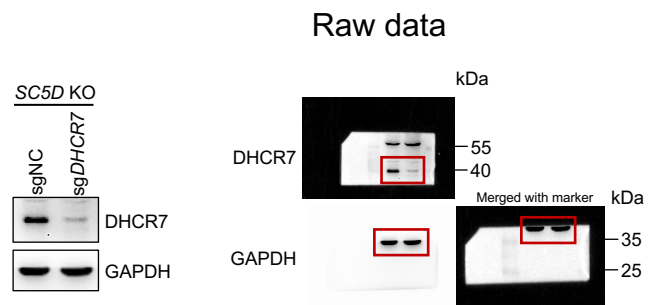

ED.Fig. 6r

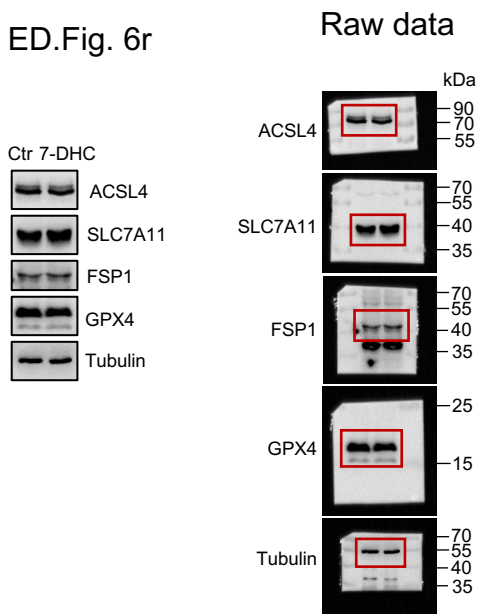

ED.Fig. 6t

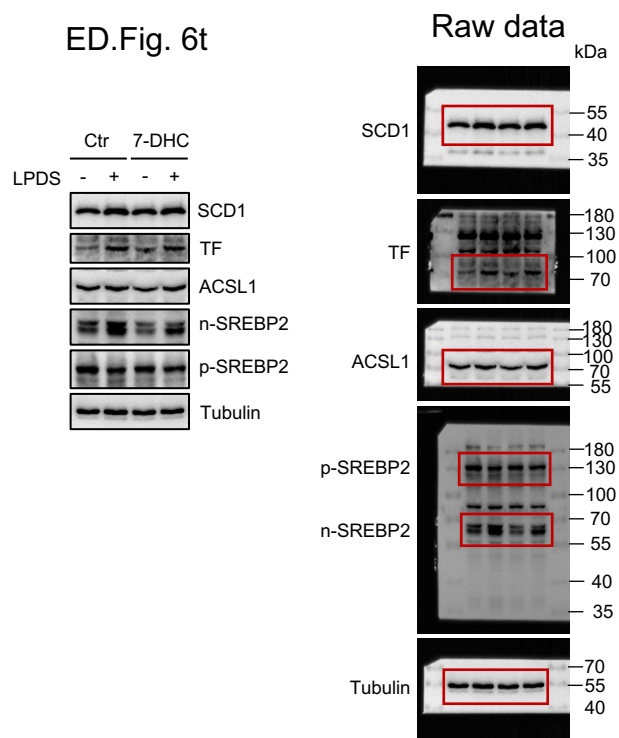

ED.Fig. 7a

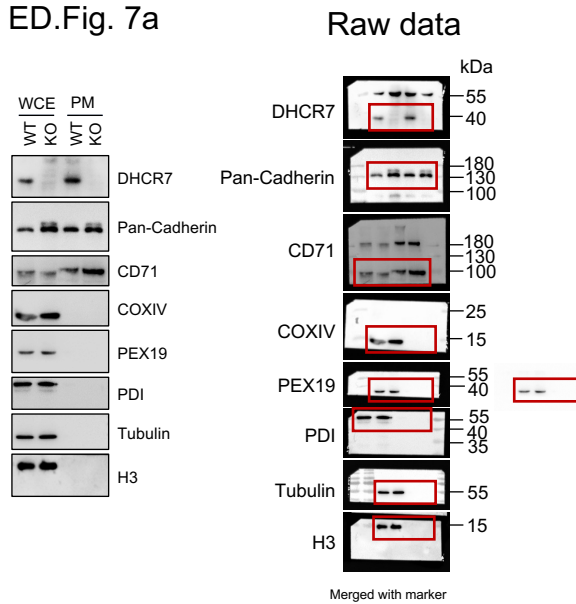

ED.Fig. 7b

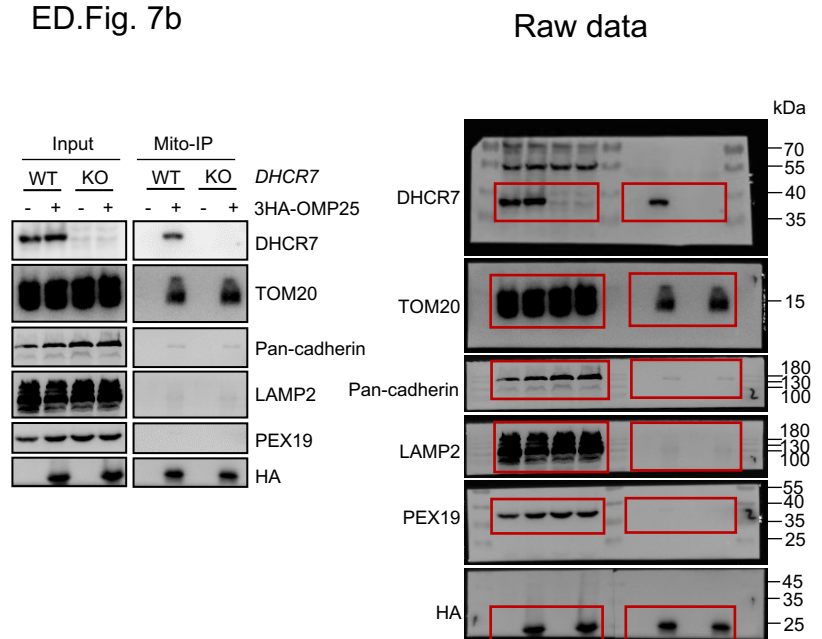

ED.Fig. 7d

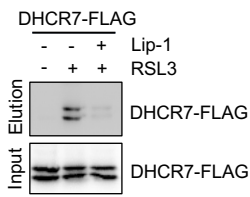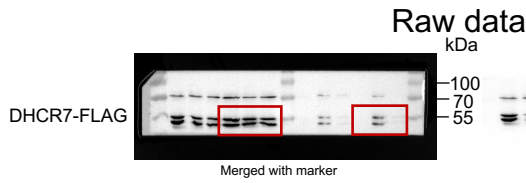

ED.Fig. 7e

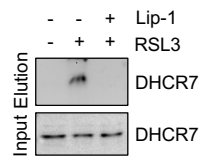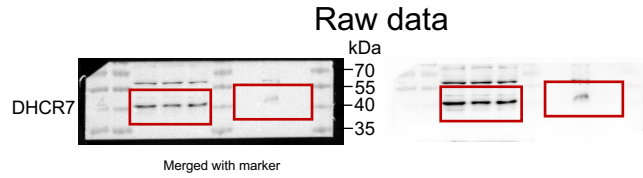

ED.Fig. 7f

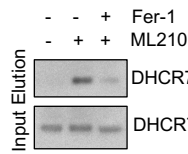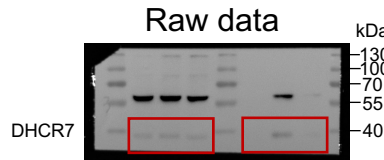

ED.Fig. 7g

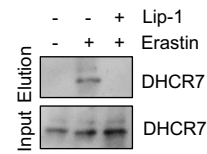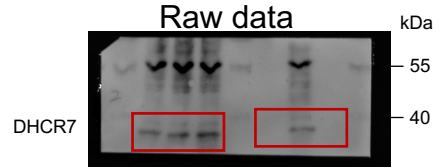

ED.Fig. 7h

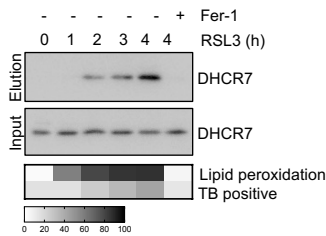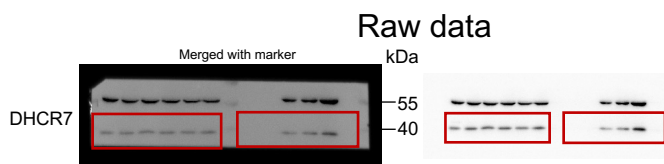

ED.Fig. 7i

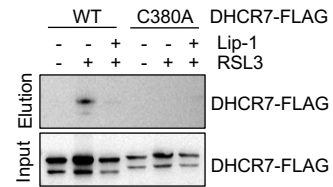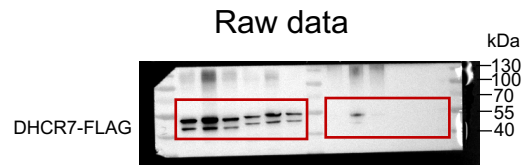

ED.Fig. 9e

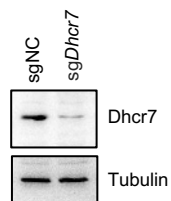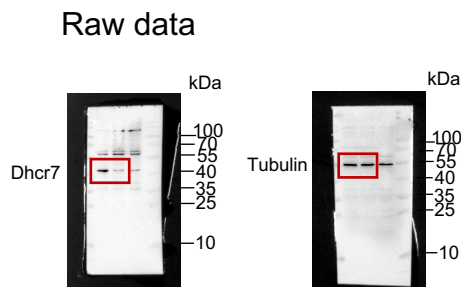

Supplementary Fig.2 (continued)
